# Supplementary material for: Barriers to Accurate Blood Pressure Measurement in the Medical Office
Source: PubMed Central journal article supplement — J Prim Care Community Health. 2018 Dec 3;9:2150132718816929. doi: 10.1177/2150132718816929 (PMC6287289; doi:10.1177/2150132718816929), 2018-12-03
Supplement: Hwang_Suppl_1_manager.pdf [file Hwang_Suppl_1_manager.pdf]

## **Appendix 1: Manager interview questions**

1. How many different clinicians measure BP for patients?
2. From your experience, what do you think interferes with the staff's ability to take the patient's blood pressure properly?
3. Do you provide any training on BP measurement for new employees? If yes, what is the training like?
  - a. Do employees shadow or have mentorship before working independently?
  - b. Is there proficiency testing for BP measurement? If so, is it periodic?
  - c. Is there a standardized training protocol for BP measurement? If not, what would you like to see for standardizing BP measurement?
  - d. How do you maintain competency for BP measurement?
  - e. In your opinion, what would make training better?
4. For BP equipment and maintenance, have you experienced any issues that may interfere with BP measurement?
5. Is there anything else you would like to share with us about the BP measurement process?
