# Supplementary material for: Barriers to Accurate Blood Pressure Measurement in the Medical Office
Source: PubMed Central journal article supplement — J Prim Care Community Health. 2018 Dec 3;9:2150132718816929. doi: 10.1177/2150132718816929 (PMC6287289; doi:10.1177/2150132718816929), 2018-12-03
Supplement: Hwang_Suppl_2_focus_grp_(1).pdf [file Hwang_Suppl_2_focus_grp_%281%29.pdf]

## Appendix 2: Focus group questions

1. When a patient arrives for an appointment, what are the most important things that you do?
2. How do you prioritize what tasks are most important?
3. What interferes with your ability to take the patient's blood pressure?
4. Are there any conflicting responsibilities that you've noticed may interfere with properly conducting BP measurement?
5. What is the training like for teaching clinic employees about measuring blood pressure?
6. What would make training better?
7. Could you please explain what you define as "hypertensive" and how that may (or may not) contribute to BP measurement?
8. After taking a 1st BP reading, what are some reasons that would prompt you to take a 2nd reading?
9. Is there a difference in BP measurement for someone with hypertension vs. someone who is non-hypertensive?
10. Is there anything else you would like to share with us that we haven't asked about your role in taking blood pressures in the clinic?
